# Supplementary material for: Drug–drug interactions with pioglitazone, losartan, and midazolam and anti-tumor efficacy and safety study of TAS- 115 in patients with solid tumors
Source: Research Square preprint supplement (doi:10.21203/rs.3.rs-7677215/v1), 2025-10-06
Supplement: Supplementary file 1 [file 182b9b54421bb21c518ff785.docx]

# **Electronic supplementary material**


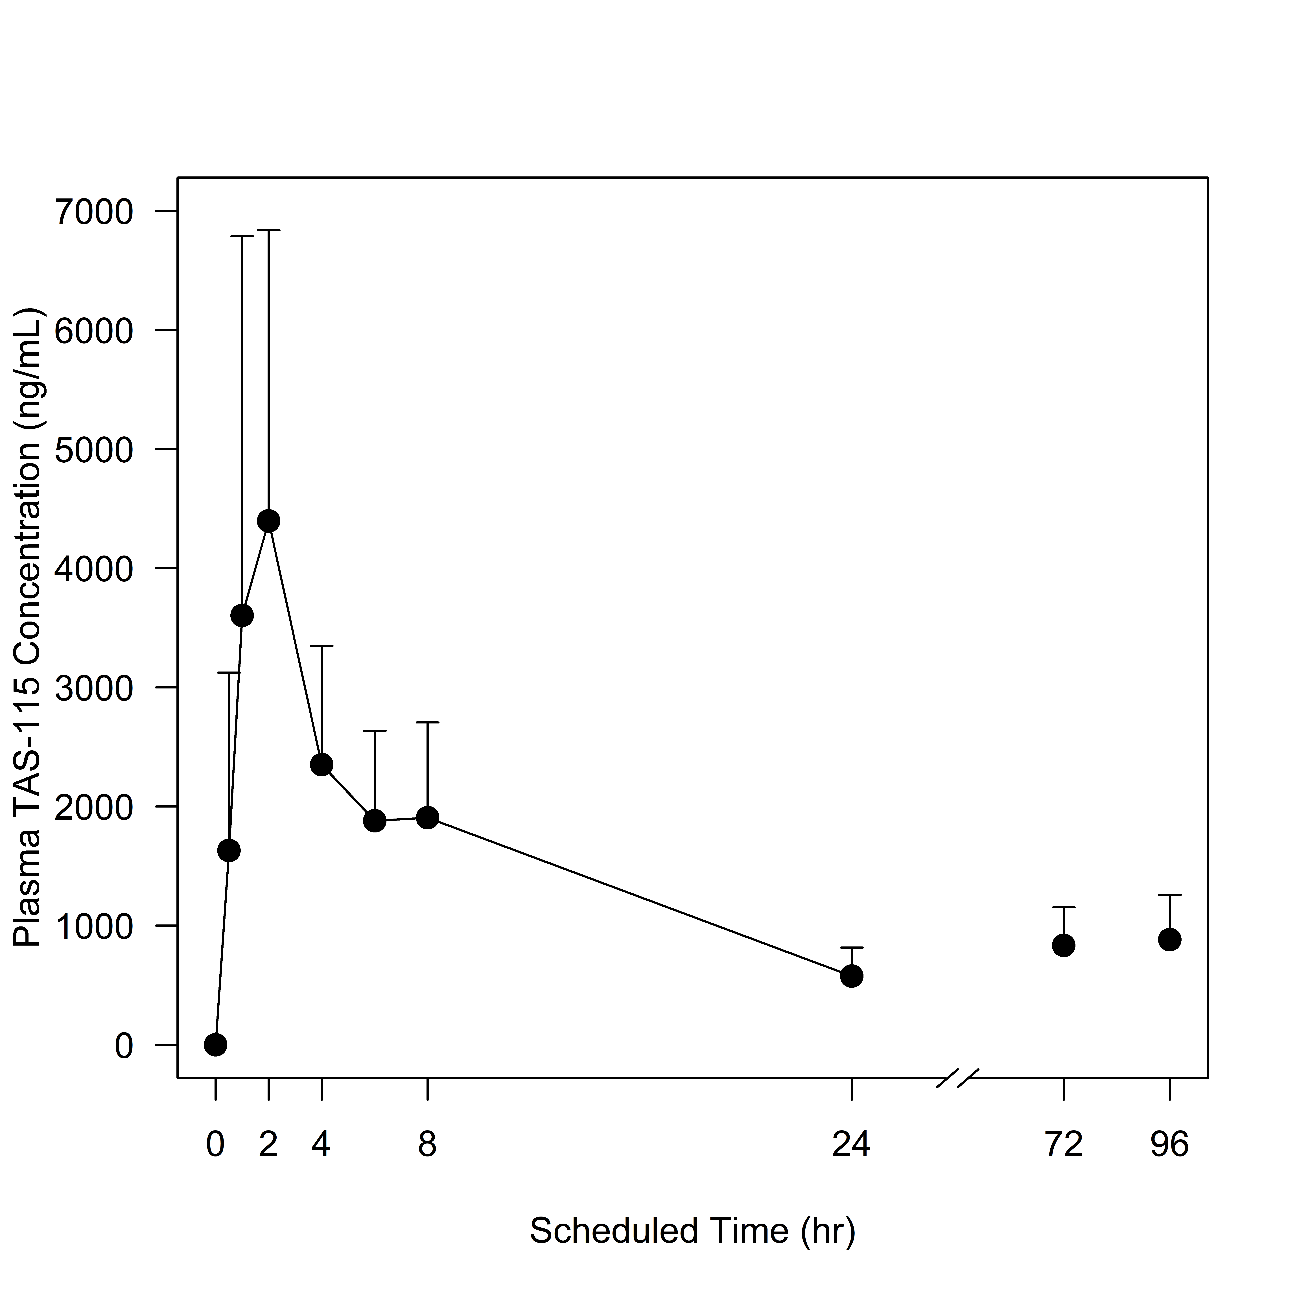


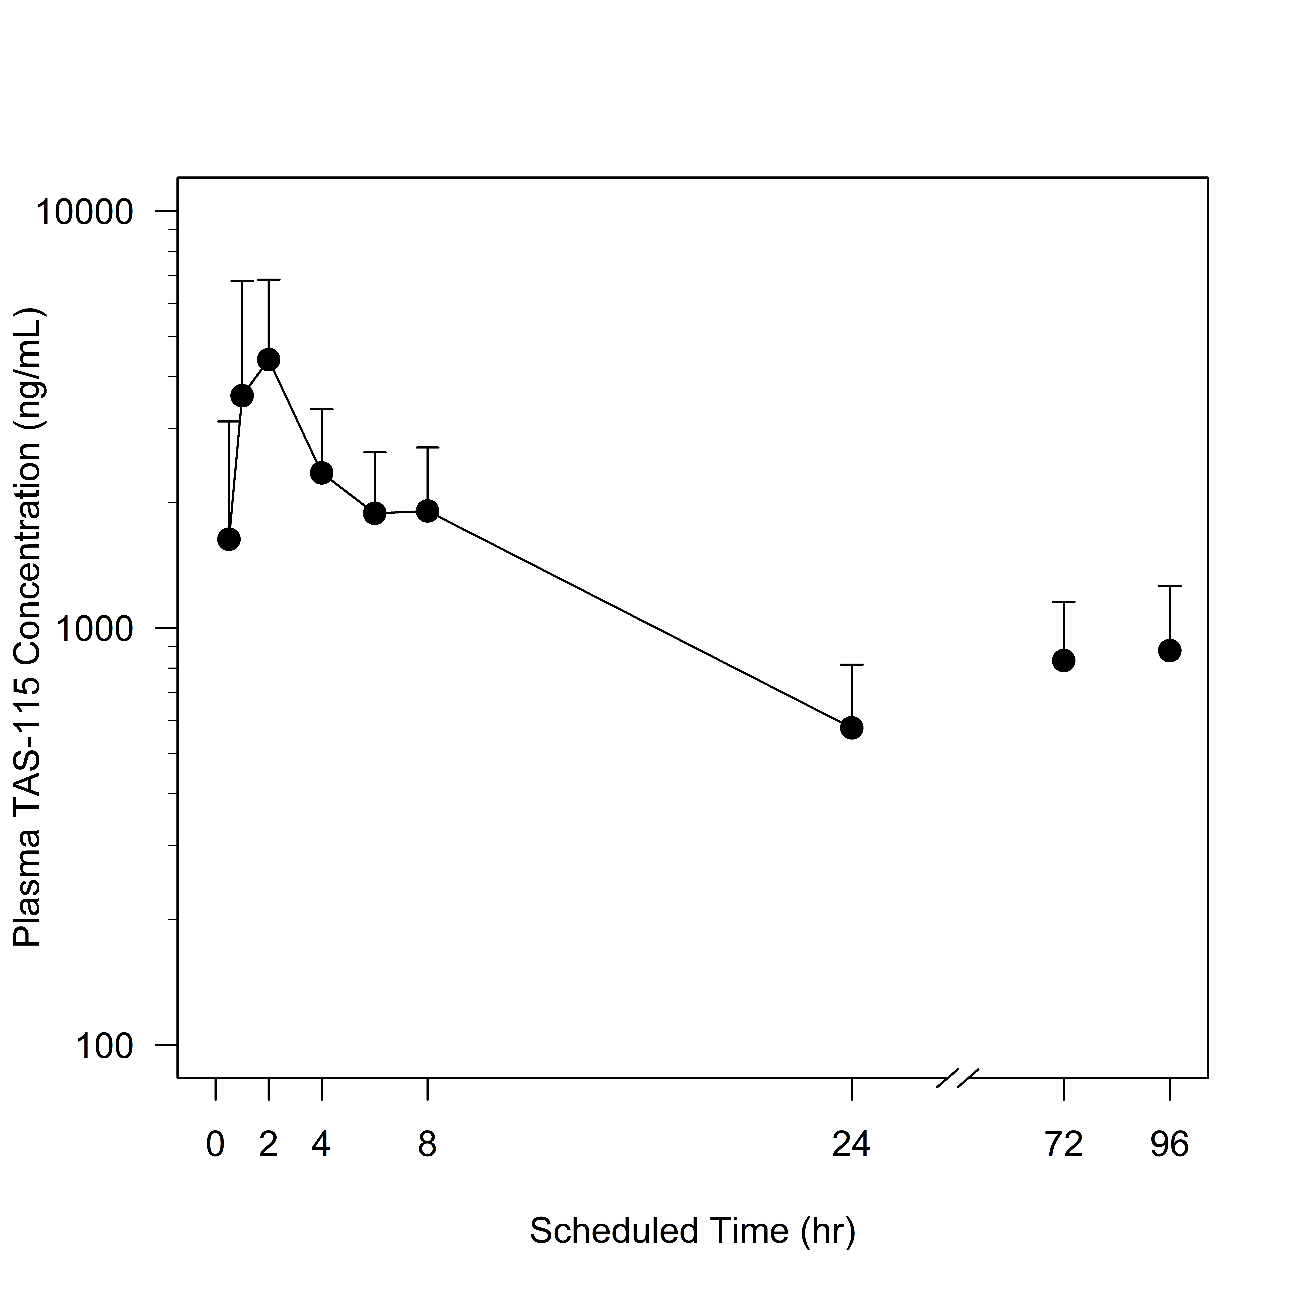
Mean + S.D., N = 18 per treatment

Plasma concentrations below the lower limit of quantification (< 10 ng/mL) are set to zero in the data summarization.

PK pharmacokinetic, S.D. standard deviation

**Figure S1. Mean plasma concentration-time profiles of TAS-115.** Plots show data for TAS-115 following the first oral administration of TAS-115 (250 mg alone), presented in linear (upper panel) and semi-logarithmic (lower panel) scales.


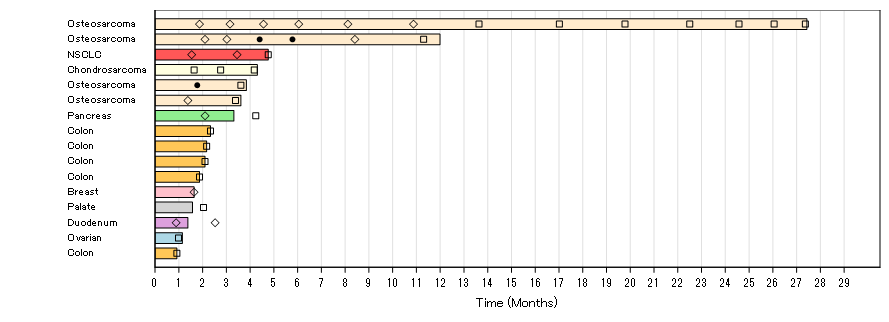


⭘ CR complete response, ⬤ PR partial response, ◇ SD stable disease, ☐ PD progressive disease

**Figure S2. The antitumor effect for each patient presented in a Swimmer plot**

Table S1. Blood sampling time-points and sampling volumes for PK analyses

| **Blood sampling time** | **Day −3** | **Day −2** | **Day 1** | **Day 2** | **Day 4** | **Day 5** |
| --- | --- | --- | --- | --- | --- | --- |
| Pre-dose (within −60 minutes or −30 minutes) a | x | x | x | x | x c | x c |
| 0.25 hours post-dose (±5 minutes) b |  | x |  |  |  | x |
| 0.5 hours post-dose (±5 minutes) b | x | x | x |  | x | x |
| 1 hour post-dose (±5 minutes) b | x | x | x |  | x | x |
| 2 hours post-dose (±10 minutes) b | x | x | x |  | x | x |
| 3 hours post-dose (±10 minutes) b | x | x |  |  | x | x |
| 4 hours post-dose (±30 minutes) b | x | x | x |  | x | x |
| 6 hours post-dose (±30 minutes) b | x | x | x |  | x | x |
| 8 hours post-dose (±30 minutes) b | x | x | x |  | x | x |
| 24 hours post-dose (±60 minutes) b |  | x |  |  |  | x |

a On Day −3, within 60 minutes before administration of pioglitazone. On Day −2, within 60 minutes before administration of losartan and midazolam. On Day 1, Day 2, Day 4, and Day 5, within 30 minutes before administration of TAS-115.

b On Day −3 and Day 4, the time after administration of pioglitazone. On Day −2 and Day 5, the time after administration of losartan and midazolam. On Day 1 and Day 2, the time after administration of TAS-115.

c Blood sampling volume was 4 mL (2 mL at all the other time-points).

PK pharmacokinetic

**Supplementary methods**

Inclusion Criteria

A patient had to meet all of the following inclusion criteria to be eligible for participation in this study:

1. Written informed consent to participate in this study provided by patients aged ≥ 20 years at the time of informed consent or by their legally acceptable representative for patients aged < 20 years at the time of informed consent (for patients aged < 20 years, assent will be obtained from them wherever possible).
2. Is ≥ 20 years of age (≥ 15 years of age for patients with malignant bone tumors) at the time of informed consent
3. Has a histologically or cytologically confirmed solid tumor (malignant tumor)
4. Is refractory or intolerant to standard or similar treatment, or for whom no appropriate treatment is available
5. Has an evaluable lesion (measurable or non-measurable) confirmed on imaging as per the Response Evaluation Criteria in Solid Tumors (RECIST) version 1.1 within 2 weeks before enrollment
6. Able to take medication orally
7. Has an Eastern Cooperative Oncology Group (ECOG) performance status (PS) of 0 to 1
8. Women of childbearing potential (WOCBP) must have a negative pregnancy test (urine or serum) within 2 weeks before enrollment (Female patients are not considered to be of childbearing potential if they are permanently sterile [hysterectomy, bilateral salpingectomy, or bilateral oophorectomy] or are post-menopausal [no menses for 12 months without an alternative medical cause].)
9. Meets the following criteria for bone marrow, hepatic, and renal functions based on data obtained within 2 weeks before enrollment:
   1. Neutrophil count: ≥ 1500/mm3 (excluding measurements within 7 days after granulocyte colony-stimulating factor [G-CSF] administration)
   2. Hemoglobin: ≥ 8.0 g/dL (excluding measurements within 7 days after packed red blood cell or whole blood transfusion)
   3. Platelet count: ≥ 7.5 × 104/mm3 (excluding measurements within 3 days after platelet transfusion)
   4. Aspartate aminotransferase (AST) / alanine aminotransferase (ALT): ≤ 3 times the upper limit of the institutional normal range
   5. Total bilirubin: ≤ 1.5 mg/dL
   6. Estimated creatinine clearance (Ccr)*: ≥ 50 mL/min
      *A measured value will be used if any.
      Cockcroft-Gault formula: Ccr (mL/min) = body weight (kg) × (140 – age)/[72 × serum creatinine (mg/dL)] *For females, the obtained value will be multiplied by 0.85.
10. Is expected to survive for at least 90 days after being enrolled in this study
11. Willing and able to comply with the scheduled visits and study procedures

Exclusion Criteria

A patient must not have met any of the following exclusion criteria to be eligible for participation in this study:

1. Received any of the following treatments:
   1. Extensive surgery requiring general anesthesia within 4 weeks before enrollment (The surgical wound should be confirmed to be healed before enrollment.)
   2. Use of any investigational drug or device within 4 weeks before enrollment
   3. Radiotherapy within 4 weeks before enrollment
   4. Anticancer therapy within 2 weeks before enrollment
   5. Bone marrow transplantation or stem cell transplantation (excluding autologous peripheral blood stem cell transplantation)
   6. Prior treatment with TAS-115
2. Has an adverse reaction caused by prior treatment that has not recovered to Grade 1 per Common Terminology Criteria for Adverse Events (CTCAE) version 5.0 (excluding anemia, alopecia, skin hyperpigmentation, peripheral sensory neuropathy, and hypertension)
3. Has a contraindication to pioglitazone, losartan, or midazolam as per the package insert
4. Has any of the following diseases or conditions:
   1. Brain metastasis that is symptomatic or requires treatment
   2. Active infection (eg, fever ≥ 38°C due to infection)
   3. Uncontrolled hypertension/diabetes mellitus
   4. Symptomatic congestive heart failure (Class 3 to 4 heart disease as defined by the New York Heart Association [NYHA]), or symptomatic or uncontrolled ventricular arrhythmia
   5. Arterial thromboembolism-related events, including myocardial infarction, unstable angina pectoris, cerebrovascular accident, transient ischaemic attack, etc., within 24 weeks before enrollment
   6. Deep vein thrombosis, pulmonary embolism, or other thromboembolism requiring treatment (excluding venous port or catheter thrombosis, or superficial vein thrombosis) within 12 weeks before enrollment
   7. Interstitial pneumonia, pulmonary fibrosis requiring treatment, pneumonitis
   8. Intestinal obstruction, intestinal paralysis, inflammatory bowel disease (Crohn’s disease, ulcerative colitis)
   9. Gastrointestinal hemorrhage requiring treatment within 12 weeks before enrollment
   10. Serious and unresolved wound within 4 weeks before enrollment
   11. Grade ≥ 2 anorexia, malaise, diarrhea, nausea, vomiting, or skin disorder as per CTCAE version 5.0
   12. Diseases requiring continuous systemic steroid administration (oral or intravenous)
5. History of allergic reactions attributed to compounds of similar chemical or biologic composition to TAS-115
6. Has a history of allergic reactions to pioglitazone, losartan, or midazolam, or adverse reactions leading to treatment discontinuation
7. Has risk factors for torsades de pointes, including a family history of heart failure, hypokalemia, and long QT syndrome
8. Has gastrointestinal dysfunction that may significantly interfere with the absorption of TAS-115, pioglitazone, losartan or midazolam (eg, history of gastrectomy, peptic ulcer disease requiring treatment)
9. Has liver metastasis or disorder that may significantly interfere with the metabolism of TAS-115, pioglitazone, losartan, or midazolam
10. Need to continuously receive any drug that may affect the PK evaluation (including OTC drugs and excluding topical formulations with a local action) during the drug-drug interaction evaluation period (a washout period at least 5 times the half-life of the drug is required before the first dose of pioglitazone.)
11. Ingestion of foods and drinks containing alcohol, caffeine, grapefruit, or St. John’s wort, or use of dietary supplements that may affect the PK evaluation within 7 days before enrollment
12. Provided a total of at least 800 mL of whole blood within 1 year before enrollment
13. Had at least 200 mL of whole blood collected within 30 days before enrollment, at least 400 mL of whole blood collected within 90 days before enrollment, or blood components collected within 14 days before enrollment
14. Is positive for hepatitis B surface (HBs) antigen, hepatitis C virus (HCV) antibody, or human immunodeficiency virus (HIV) antibody (HCV-antibody-positive patients are eligible if they tested negative for HCV ribonucleic acid [RNA])
15. Has pleural effusion, ascites, or pericardial effusion requiring body cavity drainage within 2 weeks before enrollment
16. Has a history of other primary malignancies within the previous 5 years (It is acceptable to enroll patients with a history of localized primary malignancies, such as carcinoma in situ, basal cell carcinoma, or localized squamous cell skin cancer, considered to be cured by surgery alone or by surgery with radiotherapy in the opinion of the investigator.)
17. Pregnant or possibly pregnant patients, or lactating patients (including patients who have discontinued breastfeeding)
18. Female patients of childbearing potential or male patients who do not agree to effective birth control during the following period:

- Women of childbearing potential: During the study period and for 7 months after the last dose
- Men: During the study period and for 4 months after the last dose

1. Has a psychiatric disorder that may affect informed consent or preclude compliance with the study provisions of this study
2. Is considered ineligible as a participant of this study by the investigator
