# Supplementary material for: Drug–drug interactions with pioglitazone, losartan, and midazolam and anti-tumor efficacy and safety study of TAS- 115 in patients with solid tumors
Source: Research Square preprint supplement (doi:10.21203/rs.3.rs-7677215/v1), 2025-10-06
Supplement: Supplementary file 2 [file 2ded45f41cc4c7e66fde959e.xlsx]

## Sheet: Table 1
	(a) Pioglitazone
		Pioglitazone with TAS-115			Pioglitazone Alone		GMR	90% CI	Intra-	Inter-
								(Lower, Upper)	patient	patient
	PK Parameter (unit)	Geometric LSM	N		Geometric LSM	N			CV%	CV%
	Cmax (ng/mL)	789.1	18		635.1	18	1.2424	(1.0529, 1.4660)	29.1	32.9
	AUClast (ng·hr/mL)	6839	18		6335	18	1.0796	(0.9406, 1.2392)	24.1	21.9
	AUCinf (ng·hr/mL)	7787	16		7710	14	1.0101	(0.9070, 1.1249)	15.9	19.6
	(b) Losartan
		Losartan with TAS-115			Losartan Alone		GMR	90% CI	Intra-	Inter-
								(Lower, Upper)	patient	patient
	PK Parameter (unit)	Geometric LSM	N		Geometric LSM	N			CV%	CV%
	Cmax (ng/mL)	167.1	18		158.5	18	1.0543	(0.8053, 1.3803)	49.1	55.7
	AUClast (ng·hr/mL)	395.9	18		364.1	18	1.0872	(0.9226, 1.2812)	28.9	55.8
	AUCinf (ng·hr/mL)	429.4	18		388.2	18	1.1061	(0.9678, 1.2643)	23.4	56.2
	(c-1) Midazolam
		Midazolam with TAS-115			Midazolam Alone		GMR	90% CI	Intra-	Inter-
								(Lower, Upper)	patient	patient
	PK Parameter (unit)	Geometric LSM	N		Geometric LSM	N			CV%	CV%
	Cmax (ng/mL)	20.03	18		21.91	18	0.9142	(0.8217, 1.0171)	18.6	47.9
	AUClast (ng·hr/mL)	51.58	18		55.51	18	0.9291	(0.8401, 1.0275)	17.5	62.4
	AUCinf (ng·hr/mL)	52.89	18		56.78	18	0.9316	(0.8406, 1.0325)	17.9	63.5
	(c-2) 1'-Hydroxymidazolam
		Midazolam with TAS-115			Midazolam Alone		GMR	90% CI	Intra-	Inter-
								(Lower, Upper)	patient	patient
	PK Parameter (unit)	Geometric LSM	N		Geometric LSM	N			CV%	CV%
	Cmax (ng/mL)	8.391	18		8.195	18	1.024	(0.8898, 1.1784)	24.6	45
	AUClast (ng·hr/mL)	20.13	18		19.33	18	1.0413	(0.9477, 1.1441)	16.3	43
	AUCinf (ng·hr/mL)	20.86	18		19.92	18	1.047	(0.9531, 1.1501)	16.3	43.7
	The parameters were natural log-transformed prior to analysis. The geometric LSM was calculated by exponentiating the LSMs from the ANOVA with treatment as a fixed effect and patient as a random effect. The estimates and CI limits of the LSM differences for the log-transformed values were exponentiated to calculate the GMR. GMR = (marker drug with TAS-115) / marker drug alone) ANOVA analysis of v…

## Sheet: Table 2
		Drug-Drug Interaction Evaluation Period (N=18)			Continuous
		Entire DDI	Before Administration	After Administration	Administration
		Evaluation Period (N=18)	of TAS-115 (N=18)	of TAS-115 (N=18)	Period (N=18)
		N (%)	N (%)	N (%)	N (%)
	Any TEAEs	15 (83.3)	4 (22.2)	15 (83.3)	18 (100.0)
	Any >=Grade 3 TEAEs	2 (11.1)	0 (0.0)	2 (11.1)	8 (44.4)
	Any TRAEs	15 (83.3)	1 (5.6)	15 (83.3)	-
	Any >=Grade 3 TRAEs	1 (5.6)	0 (0.0)	1 (5.6)	-
	Any TRAEs related to TAS-115	14 (77.8)	-	14 (77.8)	17 (94.4)
	Any >=Grade 3 TRAEs related to TAS-115	1 (5.6)	-	1 (5.6)	6 (33.3)
	Any TRAEs related to Pioglitazone	1 (5.6)	1 (5.6)	0 (0.0)	-
	Any >=Grade 3 TRAEs related to Pioglitazone	0 (0.0)	0 (0.0)	0 (0.0)	-
	Any TRAEs related to Losartan	1 (5.6)	0 (0.0)	1 (5.6)	-
	Any >=Grade 3 TRAEs related to Losartan	0 (0.0)	0 (0.0)	0 (0.0)	-
	Any TRAEs related to Midazolam	0 (0.0)	0 (0.0)	0 (0.0)	-
	Any >=Grade 3 TRAEs related to Midazolam	0 (0.0)	0 (0.0)	0 (0.0)	-
	Any TEAEs Leading to Discontinuation of Study Medication	0 (0.0)	0 (0.0)	0 (0.0)	1 (5.6)
	Any TRAEs Leading to Discontinuation of Study Medication	0 (0.0)	0 (0.0)	0 (0.0)	1 (5.6)
	Any TEAEs Leading to Dose Reduction of TAS-115	0 (0.0)	-	0 (0.0)	1 (5.6)
	Any TRAEs related to TAS-115 Leading to Dose Reduction of TAS-115	0 (0.0)	-	0 (0.0)	1 (5.6)
	Any TEAEs Leading to Dose Interruption of TAS-115	0 (0.0)	-	0 (0.0)	10 (55.6)
	Any TRAEs related to TAS-115 Leading to Dose Interruption of TAS-115	0 (0.0)	-	0 (0.0)	9 (50.0)
	Any SAEs	0 (0.0)	0 (0.0)	0 (0.0)	5 (27.8)
	Any Treatment-Related SAEs	0 (0.0)	0 (0.0)	0 (0.0)	2 (11.1)
	Any TEAEs Leading to Death	0 (0.0)	0 (0.0)	0 (0.0)	0 (0.0)
	Any TRAEs Leading to Death	0 (0.0)	0 (0.0)	0 (0.0)	0 (0.0)
	Before Administration of TAS-115: From Day -3 to before Day 1 administration in the Drug-Drug Interaction (DDI) Evaluation Period.
	After Administration of TAS-115: From after Day 1 administration in DDI Evaluation Period to before the Continuous Administration Period.
	TEAEs treatment-emergent adverse events, TRAEs treatment-related adverse events, SAEs serious adverse events

## Sheet: Table 3
		Efficacy-evaluable Population
		All patients (N=16)	Osteosarcoma (N=4)
	Efficacy	N (%)
	CR	0 (0.0)	0 (0.0)
	PR	1 (6.3)	1 (25.0)
	SD	5 (31.3)	1 (25.0)
	Non-CR/Non-PD	0 (0.0)	0 (0.0)
	PD	10 (62.5)	2 (50.0)
	NE	0 (0.0)	0 (0.0)
	Response Rate (CR+PR)	1 (6.3)	1 (25.0)
	95%CI (%)	[0.2 , 30.2]	[0.6 , 80.6]
	Disease Control Rate (CR+PR+SD)	6 (37.5)	2 (50.0)
	95%CI (%)	[15.2 , 64.6]	[6.8 , 93.2]
	Progression-Free Survival	N (%)
	Event	14 (87.5)	4 (100.0)
	Censored	2 (12.5)	0 (0.0)
	Median (month)	2.1	7
	95%CI (month)	[1.6, 4.0]	[3.2, -]
	Overall Survival		N (%)
	Event		3 (75.0)
	Censored		1 (25.0)
	Median (month)		13.8
	95%CI (month)		[11.1, -]
	CR complete response, PR partial response, SD stable disease, PD progressive disease, NE not evaluable, CI confidence interval
